# Supplementary material
Source: Springer Nature journal article supplement (https://www.springermedizin.de/resource/supplementary/12879_2013_3003_MOESM5_ESM.pdf/9446776)

## Biosignature Discovery

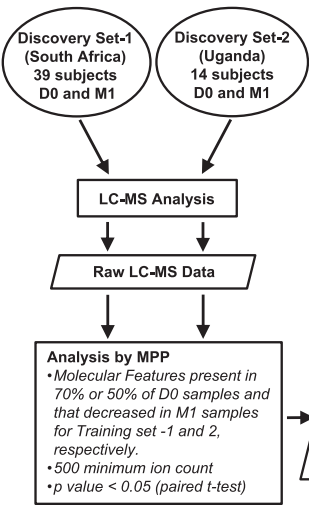

## Biosignature Down Selection and Qualification

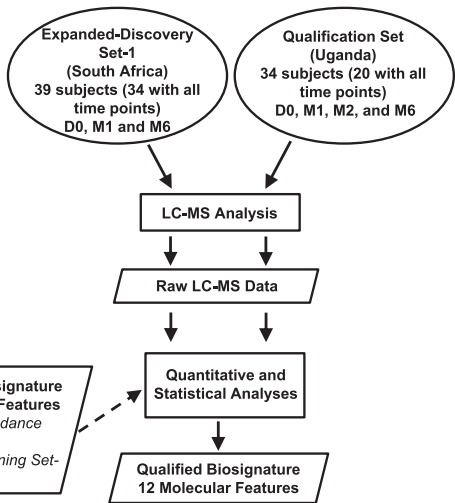

Supplement: MOESM5 [file 9446776]
